# Supplementary material for: Predicting Hepatocellular Carcinoma Risk in Chronic Hepatitis B Patients Receiving Finite Periods of Antiviral Therapy
Source: MDPI journal article supplement (doi:10.3390/cancers15133343), 2023-06-25
Supplement: s1 [file s1]

Supplementary Material

# Predicting Hepatocellular Carcinoma Risk in Chronic Hepatitis B Patients Receiving Finite Periods of Antiviral Therapy

Chih-Lang Lin, MD<sup>1,2,3,†</sup>; Szu-Yuan Wu, MD, MPH, PhD<sup>6,7,8,9,10,11,12,†,\*</sup>; Ming-Wei Lai, MD, PhD<sup>3,4,5</sup>; Chao-Wei Hsu, MD<sup>3,4</sup>; Wan-Ming Chen, PhD<sup>4,5</sup>; An-Tzu Jao, BS<sup>6</sup>; Cheng-Hung Chien, MD<sup>1,2,3</sup>; Ching-Chih Hu, MD, PhD<sup>1,3</sup>; Rong-Nan Chien, MD<sup>3,4,\*</sup>; Chau-Ting Yeh, MD, PhD<sup>3,4,\*</sup>

**Supplemental Table S1.** Hepatocellular Carcinoma Risk Assessment Using PAGE-B Predictive Scoring System

| CGMH Predictive Scoring | Group         | HCC Risk      |            |
|-------------------------|---------------|---------------|------------|
|                         |               | No HCC, N (%) | HCC, N (%) |
| 0–9                     | Low risk      | 159 (100.00%) | 0 (0.00%)  |
| 10–17                   | Moderate risk | 398 (95.90%)  | 17 (4.10%) |
| ≥18                     | High risk     | 200 (92.59%)  | 16 (7.41%) |

**Abbreviations:** CGMH, Chang Gung Memorial Hospital; HCC, Hepatocellular carcinoma; N, number.
